# Supplementary material
Source: PubMed Central journal article supplement (PMC5328551)
Supplement: AAC.01911-16_zac003175935s1.pdf [file AAC.01911-16_zac003175935s1.pdf]

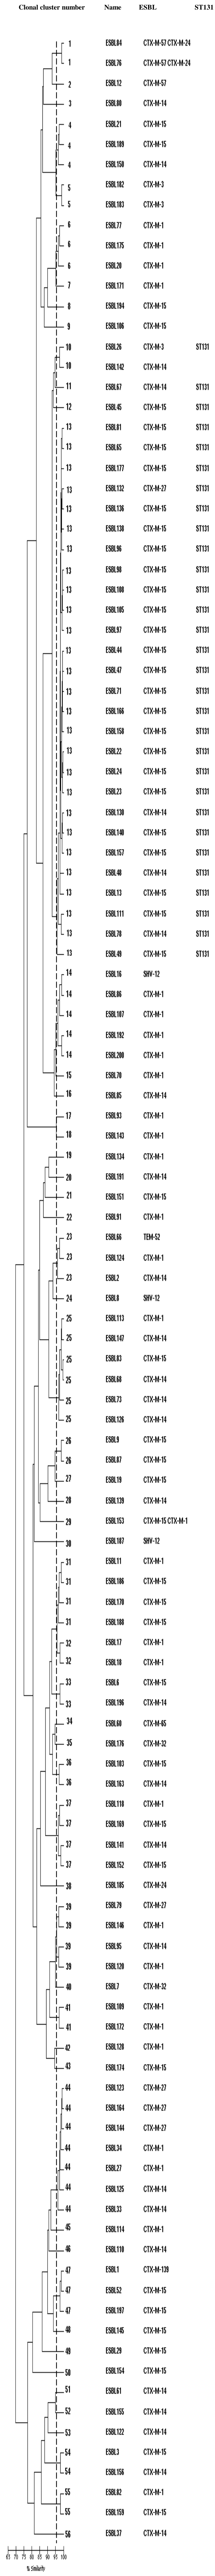

**Figure S1** : Dendrogram of *E. coli* strains. The vertical hashed line indicates the criterion for clonality ( $\geq 95\%$  similarity).
